# Supplementary material for: Genome-wide association study reveals the genetic architecture of root hair length in maize
Source: BMC Genomics. 2021 Sep 14;22:664. doi: 10.1186/s12864-021-07961-z (PMC8442424; doi:10.1186/s12864-021-07961-z)
Supplement: Supplementary file 4 — Additional files 4: Supplemental Table 2. Pathways associated with increased root hair length at statistical significance P < 0.05. [file 12864_2021_7961_MOESM4_ESM.xlsx]

## Sheet: Table S2
Supplemental Table 2. Pathways associated with increased root hair length at statistical significance P < 0.05.
MaizeCyc ID	Pathway name	P-value	FDR
PWY-5686	uridine-5'-phosphate biosynthesis	0.000855314	0.222579
PWY-6440	spermine and spermidine degradation II	0.00225204	0.222579
PWY-361	phenylpropanoid biosynthesis	0.00227655	0.222579
PWY-6527	stachyose degradation	0.00334251	0.222579
GLYSYN-THR-PWY	glycine biosynthesis IV	0.00343486	0.222579
PWY-5168	ferulate and sinapate biosynthesis	0.0042043	0.227032
PWY-4984	urea cycle	0.00514684	0.238225
SALVADEHYPOX-PWY	adenosine nucleotides degradation II	0.00925975	0.30909
CITRULLINE-DEG-PWY	citrulline degradation	0.0112805	0.30909
TRESYN-PWY	trehalose biosynthesis I	0.0114867	0.30909
PWY-5868	simplecoumarins biosynthesis	0.012678	0.30909
PWY-1121	suberin biosynthesis	0.0132685	0.30909
PWY-241	C4 photosynthetic carbon assimilation cycle	0.0133264	0.30909
PWY-6475-1	<i>trans</i>-lycopene biosynthesis II (plants)	0.0133558	0.30909
PWY-3841	folate transformations II (plants)	0.017791	0.37554
PWY-5826	hypoglycin biosynthesis	0.0185452	0.37554
GALACTMETAB-PWY	UDP-galactose biosynthesis (salvage pathway from galactose using UDP-glucose)	0.0216917	0.393839
CALVIN-PWY	Calvin-Benson-Bassham cycle	0.02188	0.393839
PWY-6317	galactose degradation I (Leloir pathway)	0.0250447	0.427078
PWY-1001	cellulose biosynthesis	0.0267301	0.433027
PWY-5097	lysine biosynthesis VI	0.0364096	0.4979
PWY-6299	aldehyde oxidation I	0.0367937	0.4979
PWYQT-4436	UDP-galactose biosynthesis	0.0375924	0.4979
PWY-5153	anthocyanin biosynthesis (delphinidin 3-O-glucoside)	0.0388398	0.4979
PWY-83	monolignol glucosides biosynthesis	0.0399549	0.4979
PWY-116	coniferin metabolism	0.0399549	0.4979
PWY-1061	homogalacturonan biosynthesis	0.0458333	0.536122
PWY-181	photorespiration	0.049152	0.536122
